# Supplementary material
Source: PubMed Central journal article supplement (PMC2909641)
Supplement: NIHMS220022-supplement-Supp_Fig_S1-S4___Table_S1-S2.pdf [file NIHMS220022-supplement-Supp_Fig_S1-S4___Table_S1-S2.pdf]

## **SUPPLEMENTARY MATERIALS**

### **MATERIALS AND METHODS**

#### **Real-Time RT-PCR Conditions**

The RT reaction was performed with the following parameters: 60 minutes at 44 °C followed by 15 minutes at 70 °C. The reaction contained 2.5 ng/μL random hexamer, 25 ng/μL oligo dT 18 mer (Integrated DNA Technologies, Coralville, IA), 500 μM dNTPs (Bioline, Taunton, MA), 1X RT Buffer, 10 mM dithiothreitol (DTT), 10 U superase inhibitor (Ambion, Austin, TX), and 100 U Superscript II reverse transcriptase (Invitrogen, Carlsbad, CA) in a 20 μL total reaction volume. Quantification of cDNA was performed with the Quant-iT PicoGreen dsDNA assay kit (Invitrogen). The cDNA (6 ng) was then used as the template for Real-Time PCR performed in an iQ5 Multicolor Real-Time PCR detection system (BioRad, Hercules, CA). PCR reactions were carried out using a two-step amplification with a melt curve using the following cycle parameters: 7 minutes at 95 °C, followed by 35 cycles of 10 s at 95 °C and 30 s at 55 °C. For each gene, the reaction was conducted in triplicate in a 25 μL reaction volume containing 1X PCR buffer, 3 mM MgCl<sub>2</sub>, 800 μM dNTPs (Bioline), 10 nM fluorescein (USB Corporation, Cleveland, OH), 0.025X SYBR Green (Invitrogen), 0.1% Triton X-100, 100 ng/μL bovine serum albumin (Sigma, St. Louis, MO), 5% DMSO (Sigma), 0.03 U/μL Immolase DNA polymerase (Bioline), and 200 nM of each primer set (Integrated DNA Technologies) (see Table S1).

#### **Proteasome-enriched homogenates from spleen**

Single spleen homogenates from 2 mo. mice were prepared similar to methods described previously (Husom et al., 2004). Frozen spleen was homogenized in buffer containing 20mM Tris (pH 7.4), 20% (wt/vol) sucrose, 2 mM MgCl<sub>2</sub>, 10 mM glucose, and 2% (wt/vol) CHAPS. Tissue homogenate was centrifuged at 4600 x g for 15 min at 4 °C. The pellet was

rehomogenized and centrifuged as above. Supernatants were combined and centrifuged at 12,000 x g for 15 min at 4 °C. The final supernatant was centrifuged at 100,000 x g at 4 °C for 16 h. Pellets enriched for proteasome were resuspended in 50 mM Tris-HCl, 5mM MgCl<sub>2</sub> (pH 7.5). Protein concentration was determined using the BCA assay.

### **Western Blotting**

Western blot membranes were incubated with a primary antibody (Table S2) for 14-16 h at 4 °C. The appropriate secondary antibody conjugated to HRP (Pierce) was applied to the membrane. Membranes were developed using SuperSignal West Dura Extended Duration chemiluminescence substrate (Pierce). Images were taken using a ChemiDoc XRS (Bio-Rad) and densitometry was performed using Quantity One (Bio-Rad). Samples were normalized to a standard run on each blot. To confirm incorporation of proteasome  $\beta$ -subunit in the proteasome complex, Western blot antibody reactions were aligned with the 20S proteasome purified from mouse spleen that was run on each blot to ensure that only the processed form of the subunit was measured.

**Supplementary Table 1. Primers used for Real-Time RT-PCR.**

| Gene       | Accession # | Product (bp) | Primer Sequence                     |
|------------|-------------|--------------|-------------------------------------|
| LMP7       | NM_010724   | 101          | For 5'-GGGACAAGAAGGGACCAGGA-3'      |
|            |             |              | Rev 5'-TGCCGGTAACCACTGTCCATCA-3'    |
| LMP2       | NM_013585   | 133          | For 5'-CATCATGGCAGTGGAGTTTG-3'      |
|            |             |              | Rev 5'-TGAGAGGGCACAGAAGATG-3'       |
| MECL-1     | NM_013640   | 120          | For 5'-AAGACCGGTTCCAGCCAAACATGA-3'  |
|            |             |              | Rev 5'-TGATCACACAGGCATCCACATTGC -3' |
| $\beta$ 5  | NM_011186   | 145          | For 5'-CGAATCGAAATGCTTCACGG -3'     |
|            |             |              | Rev 5'-GAAGGTACGGGTTGATCTCT -3'     |
| $\beta$ 1  | NM_008946   | 132          | For 5'-GCCTTAGCTGTTTCGTCGAG -3'     |
|            |             |              | Rev 5'-TAGAACCACGCCCCCATTAAA -3'    |
| $\beta$ 2  | NM_011187   | 122          | For 5'-GTGTCGGTGTTTCAGCCAC -3'      |
|            |             |              | Rev 5'-GTGCCAGTTTTCCGAGCTTTC -3'    |
| $\alpha$ 7 | NM_011184   | 143          | For 5'-AAACAGTAGTACAGCGATTGGG-3'    |
|            |             |              | Rev 5'-CTGCAACTGCCATTCCAACA-3'      |
| ARBP       | NP_031501   | 102          | For 5'-CTTTCTGGAGGGTGTCCGCAA -3'    |
|            |             |              | Rev 5'-ACGCGCTTGTACCCATTGATGA -3'   |

Accession number is from NCBI database. For, Forward; Rev, Reverse; ARBP, acidic ribosomal phosphoprotein P0.

**Supplementary Table 2. Antibodies used for Western blotting.**

| Antibody      | Type | Dilution | Company                          |
|---------------|------|----------|----------------------------------|
| $\alpha 7$    | M    | 1:1000   | Biomol, Plymouth Meeting, PA     |
| LMP2          | M    | 1:1000   | Biomol                           |
| LMP7          | R    | 1:1000   | Biomol                           |
| $\beta 1$     | R    | 1:1000   | Affinity BioReagents, Golden, CO |
| $\beta 5$     | R    | 1:1000   | Affinity BioReagents             |
| PA28 $\alpha$ | R    | 1:1000   | Biomol                           |
| PA700 S4      | R    | 1:1000   | Affinity BioReagents             |
| Ubiquitin     | R    | 1:650    | Stressgen, Ann Arbor, MI         |

All antibodies were isotype IgG. Monoclonal, host species mouse (M); polyclonal, host species rabbit (R).

### Supplementary Figure 1

mRNA expression of proteasome subunits in 2 mo. mouse retina. (A) Representative 2% agarose gel of PCR products for immunoproteasome subunits (LMP2, LMP7, and MECL-1),  $\alpha 7$  proteasome subunit, and ARBP (reference gene). 1=WT, 2=L7M1, 3=L7. Size marker units are in base pairs. Summary of qRT-PCR results for the (B)  $\alpha 7$  subunit, immunoproteasome subunits (LMP2, MECL-1), and (C) standard catalytic proteasome subunits ( $\beta 5$ ,  $\beta 1$ ,  $\beta 2$ ). Values are mean  $\pm$  SEM and are expressed relative to WT. WT n=5-8; L7 n=4-9; L7M1 n=9.

### Supplementary Figure 2

Age- and strain-related content of ubiquitin-modified proteins. Summary of Western blot densitometry for WT (■), L7 (○) and L7M1 (Δ) retina. Two-way ANOVA results showed no significant difference with age or between strains of ubiquitin-modified proteins. All values are mean  $\pm$  SEM and are shown relative to WT 2 mo. WT n=4-6; L7 n=3-7; L7M1 n=3-6 per group.

### Supplementary Figure 3

Age- and strain-related measures of content of proteasome activators. Summary of Western blot densitometry for WT (■), L7 (○) and L7M1 (Δ) retina. Two-way ANOVA results are provided in panels A and B. (A) PA700 S4 subunit content. No significant difference with age or between mouse strains. (B) PA28 $\alpha$  subunit content. No significant difference with age or between mouse strains. All values are mean  $\pm$  SEM and are shown relative to WT 2 mo. WT n=3-15; L7 n=4-7; L7M1 n=2-7 per group.

### Supplementary Figure 4

Catalytic activity of standard and immunoproteasome. (A) Representative Western blot of proteasome-enriched homogenates from WT or L7M1 spleen. (B) Catalytic activity of proteasome-enriched homogenates from WT (solid) or L7M1 (cross-hatched) spleen using fluorogenic peptide substrates to test chymotrypsin-like (CT-L), trypsin-like (T-L), and caspase-like (C-L) activities. Two-sample T-tests were performed; \*, indicates significance at  $p < 0.05$ . All values are mean  $\pm$  SEM,  $n=4$  per group.

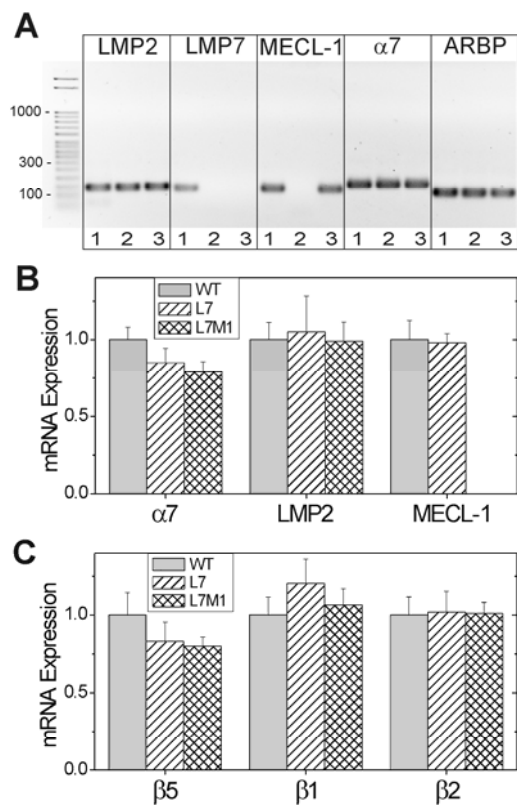

Supplementary Figure 1

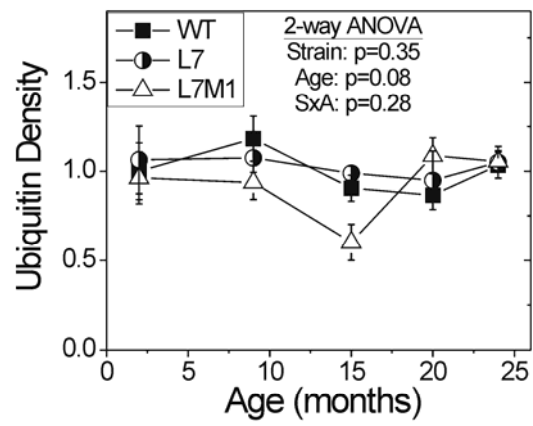

Supplementary Figure 2



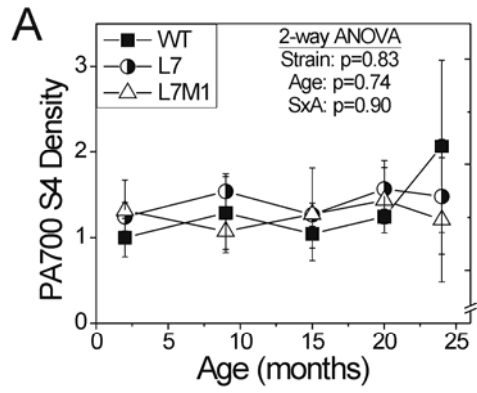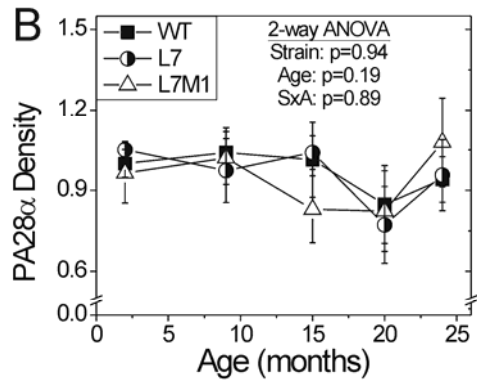

Supplementary Figure 3

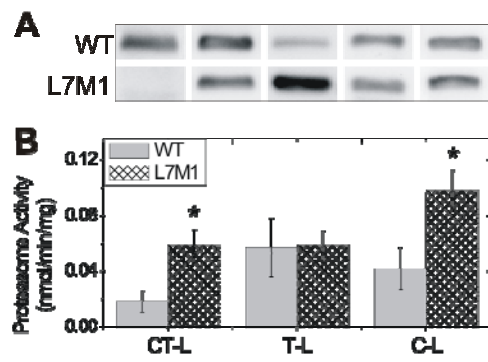

Supplementary Figure 4
